# Supplementary material for: Emotion and Emotion Regulation During Parent-Child Interactions: The Effect of Partner Presence
Source: Research Square preprint supplement (doi:10.21203/rs.3.rs-3624975/v1), 2023-11-25
Supplement: Supplementary file 1 [file 2be599a7540e3a27dce8c585.docx]

| **Table 1** |  | |  |  |
| --- | --- | --- | --- | --- |
| Study 1 Demographics | | | | |
| Demographic Factor | | | Frequency | Percent |
| Gender | | |  |  |
|  | Male | | 232 | 62.73 |
|  | Female | | 137 | 37.26 |
| Race |  | |  |  |
|  | White | | 274 | 73.91 |
|  | Black | | 31 | 8.39 |
|  | Latino/a | | 26 | 6.83 |
|  | Asian | | 21 | 5.59 |
|  | Other | | 17 | 4.66 |
| Marital Status | | |  |  |
|  | Married | | 297 | 80.43 |
|  | Single | | 51 | 13.66 |
|  | Divorced | | 21 | 5.59 |
| Parents’ Age (yrs) | | Range | Mean | SD |
|  | | 21 - 62 | 36.15 | 8.05 |
| Note: SD = Standard Deviation | | | | |
|  | |  |  |  |
|  | | | | |

| **Table 2** |  | |  |  |
| --- | --- | --- | --- | --- |
| Study 2 Demographics | | | | |
| Demographic Factor | | | Frequency | Percent |
| Gender | | |  |  |
|  | Male | | 13 | 18.8 |
|  | Female | | 55 | 81.2 |
| Race |  | |  |  |
|  | Caucasian | | 34 | 50 |
|  | Asian/Pacific Islander | | 21 | 30.88 |
|  | Hispanic/Latino | | 4 | 5.88 |
|  | Other | | 7 | 10.29 |
|  | Missing | | 2 | 2.94 |
| Parents’ Age (yrs) | | Range | Mean | SD |
|  | | 30 – 63 | 44.70 | 7.45 |
| Note: SD = Standard Deviation | | | | |
